# Supplementary material for: Comparative hydrothermal synthesis of CeO2 crystals for use in light-scattering layers of dye-sensitized solar cells
Source: Royal Society of Chemistry journal article supplement (doi:10.1039/d0ce01503b), 2020-12-28
Supplement: d0ce01503b1.pdf [file d0ce01503b1.pdf]

Supplementary Material for CrystEngComm

**Comparative hydrothermal synthesis of CeO<sub>2</sub> crystals for use in light scattering layers of dye-sensitized solar cells**

Takahito Shoji, Manabu Hagiwara, and Shinobu Fujihara\*

*Department of Applied Chemistry, Keio University, 3-14-1 Hiyoshi, Kohoku-ku, Yokohama  
223-8522, Japan. E-mail: shinobu@aplc.keio.ac.jp*

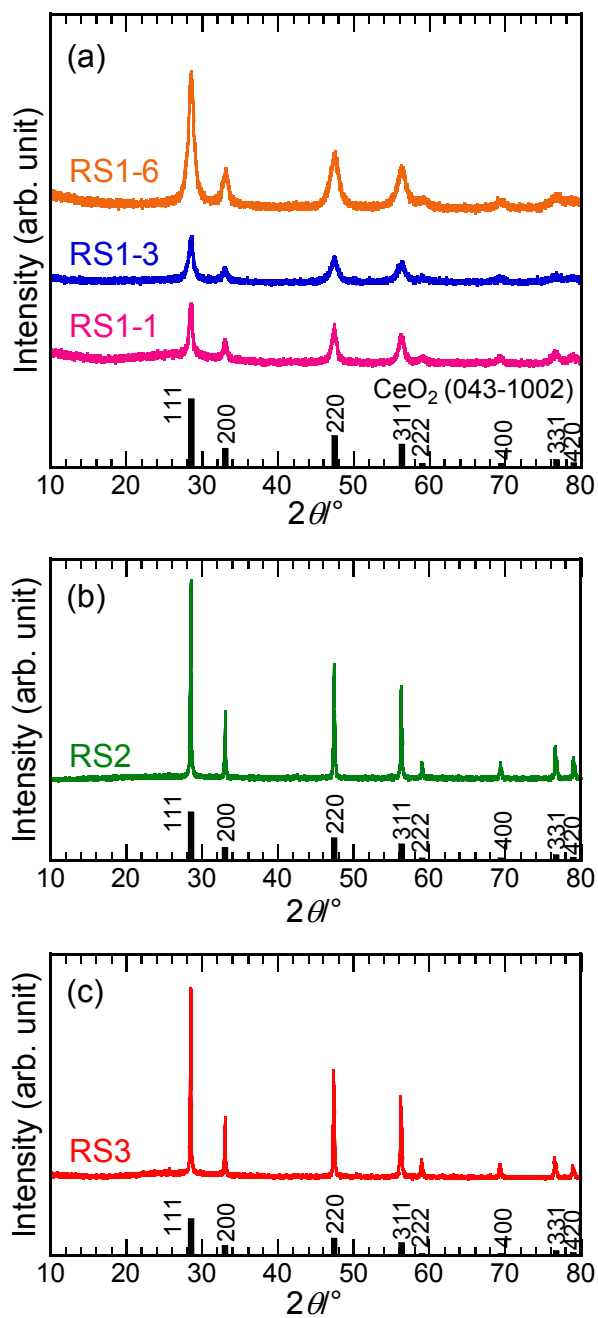

**Fig. S1** XRD patterns of the  $\text{CeO}_2$  particles obtained from (a) the RS1 (RS1-1, -3, and -6 corresponding to the  $\text{Ce}^{3+}$  concentrations), (b) the RS2, and (c) the RS3 solution through the hydrothermal reaction.

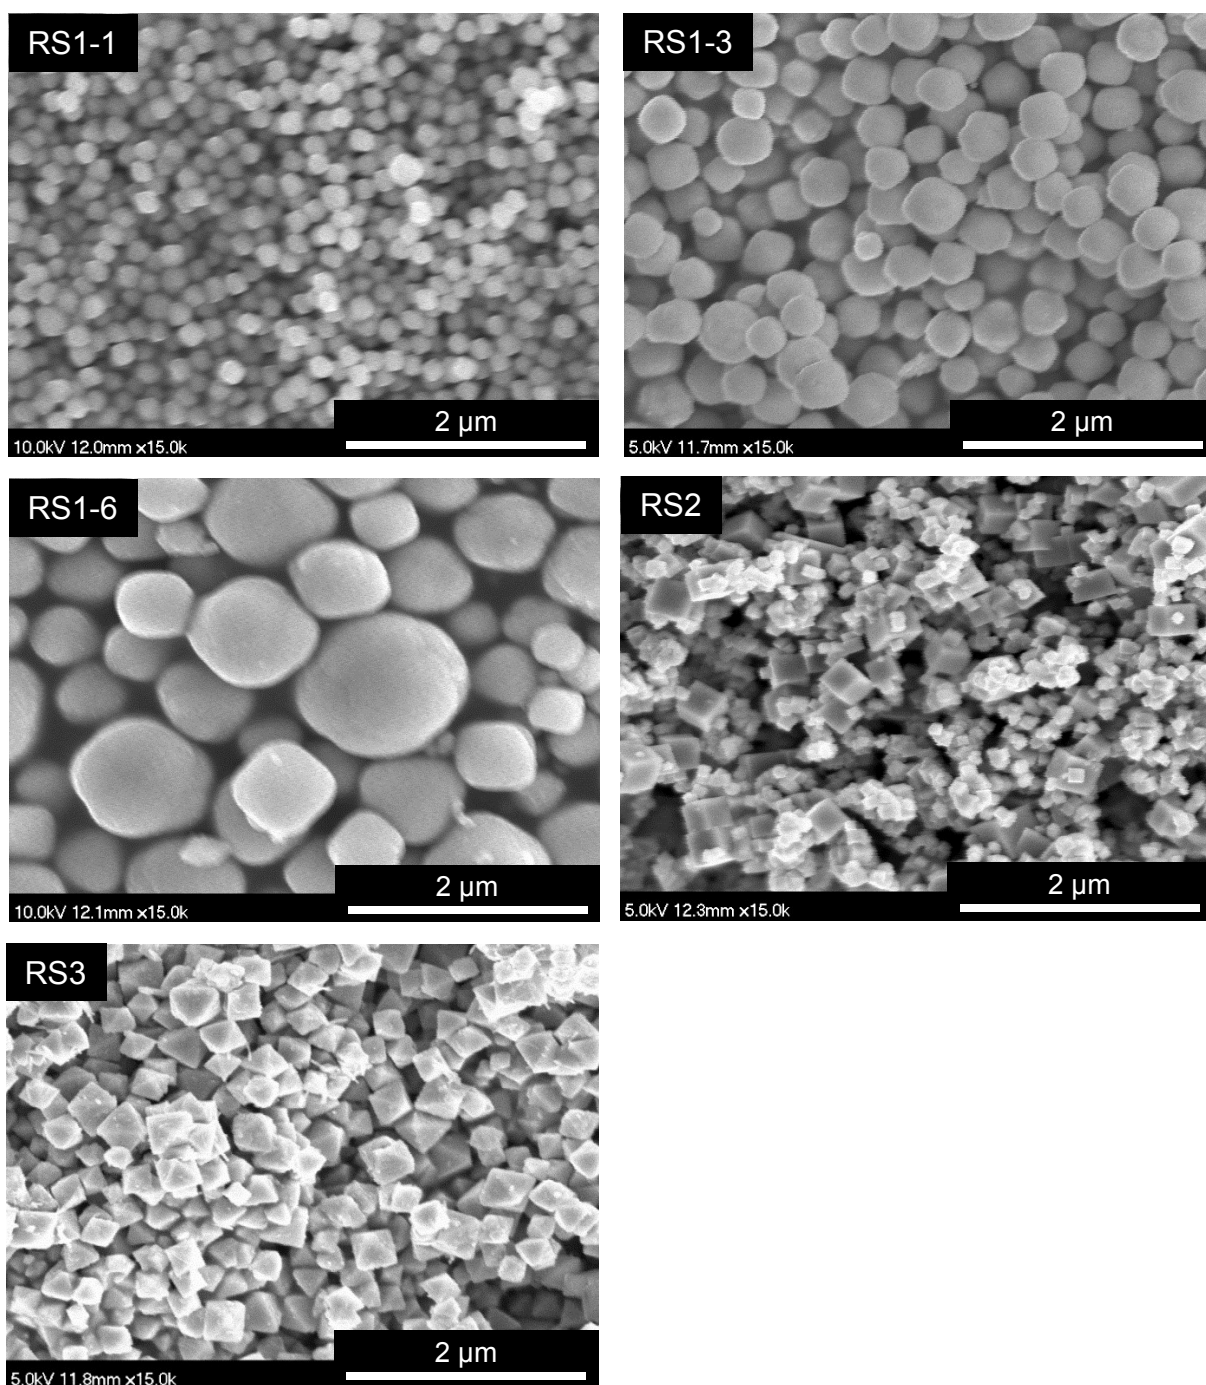

**Fig. S2** Large-scale FESEM images of the CeO<sub>2</sub> particles obtained from the RS1 (RS1-1, -3, and -6 corresponding to the Ce<sup>3+</sup> concentrations), the RS2, and the RS3 solution through the hydrothermal reaction.

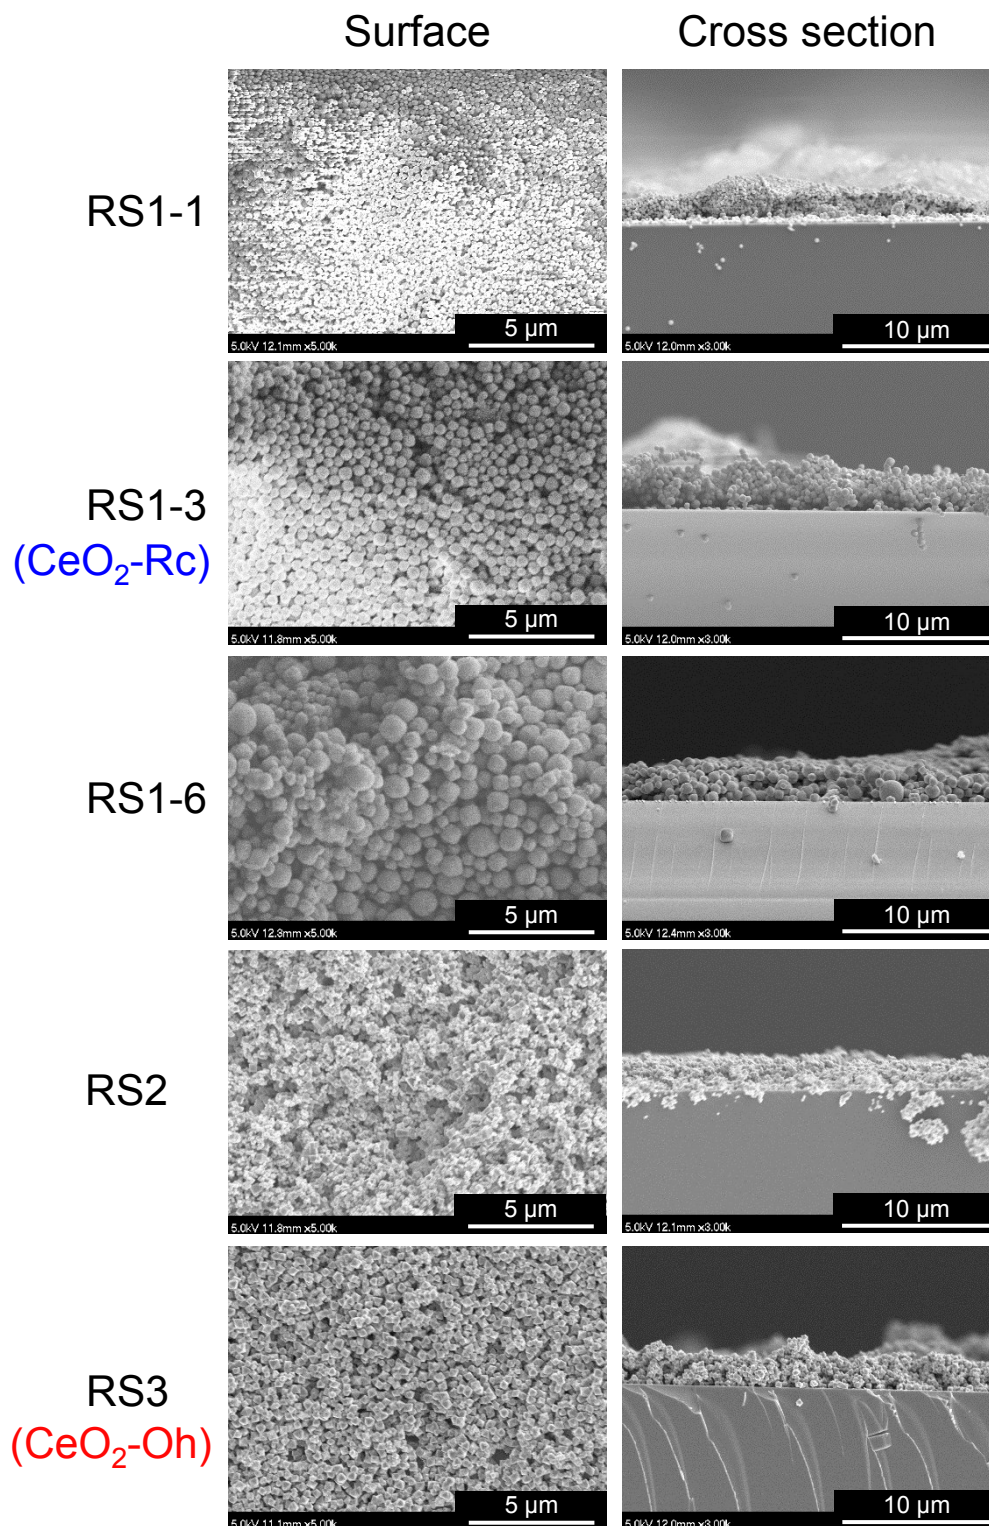

**Fig. S3** Surface and cross-sectional FESEM images of the CeO<sub>2</sub> films fabricated using the CeO<sub>2</sub> particles obtained from the RS1 (RS1-1, -3, and -6 corresponding to the Ce<sup>3+</sup> concentrations), the RS2, and the RS3 solution through the hydrothermal reaction.

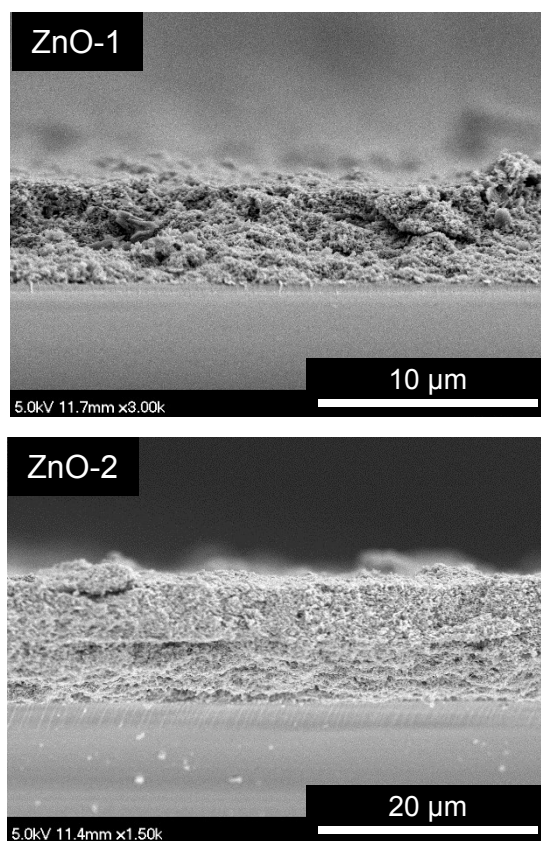

**Fig. S4** Cross-sectional FESEM images of the ZnO-1 and the ZnO-2 film.

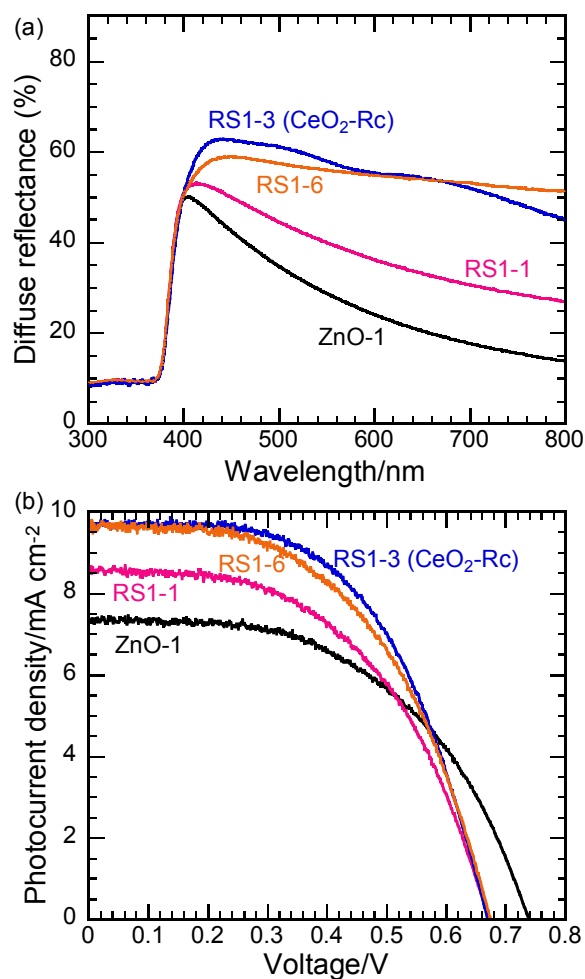

**Fig. S5** (a) Diffuse reflectance spectra, measured from the substrate side, of the ZnO-1 films without or with the CeO<sub>2</sub> layers using the RS1-1, the RS1-3 (CeO<sub>2</sub>-Rc), or the RS1-6 particles, and (b)  $J$ - $V$  curves of the DSSCs using these films sensitized with N-719.

**Table S1** Characteristics of DSSCs using the N719-sensitized ZnO and CeO<sub>2</sub>/ZnO films.

| Film        | $J_{sc}/\text{mA cm}^{-2}$ | $V_{oc}/\text{V}$ | $ff$ (-) | $\eta$ (%) | Dye amount/ $10^{-8}$ mol cm <sup>-2</sup> |
|-------------|----------------------------|-------------------|----------|------------|--------------------------------------------|
| ZnO-1       | 7.45                       | 0.731             | 0.528    | 2.87       | 5.7                                        |
| RS1-1/ZnO-1 | 8.27                       | 0.673             | 0.526    | 2.92       | 8.8                                        |
| RS1-3/ZnO-1 | 9.85                       | 0.664             | 0.550    | 3.60       | 10.4                                       |
| RS1-6/ZnO-1 | 9.78                       | 0.668             | 0.508    | 3.32       | 8.1                                        |

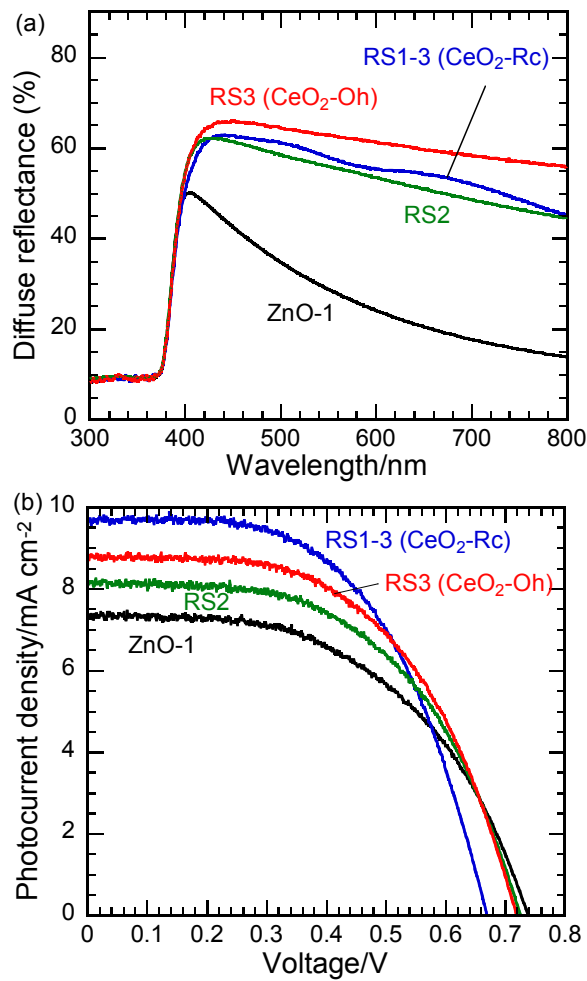

**Fig. S6** (a) Diffuse reflectance spectra, measured from the substrate side, of the ZnO-1 films without or with the CeO<sub>2</sub> layers using the RS1-3 (CeO<sub>2</sub>-Rc), RS2, or the RS3 (CeO<sub>2</sub>-Oh) particles, and (b)  $J$ - $V$  curves of the DSSCs using these films sensitized with N-719.

**Table S2** Characteristics of DSSCs using the N719-sensitized ZnO and CeO<sub>2</sub>/ZnO films.

| Film        | $J_{sc}/\text{mA cm}^{-2}$ | $V_{oc}/\text{V}$ | $ff$ (-) | $\eta$ (%) | Dye amount/ $10^{-8}$ mol cm <sup>-2</sup> |
|-------------|----------------------------|-------------------|----------|------------|--------------------------------------------|
| ZnO-1       | 7.45                       | 0.731             | 0.528    | 2.87       | 5.7                                        |
| RS1-3/ZnO-1 | 9.85                       | 0.664             | 0.550    | 3.60       | 10.4                                       |
| RS2/ZnO-1   | 8.16                       | 0.726             | 0.471    | 2.81       | 6.2                                        |
| RS3/ZnO-1   | 9.27                       | 0.713             | 0.542    | 3.58       | 8.0                                        |

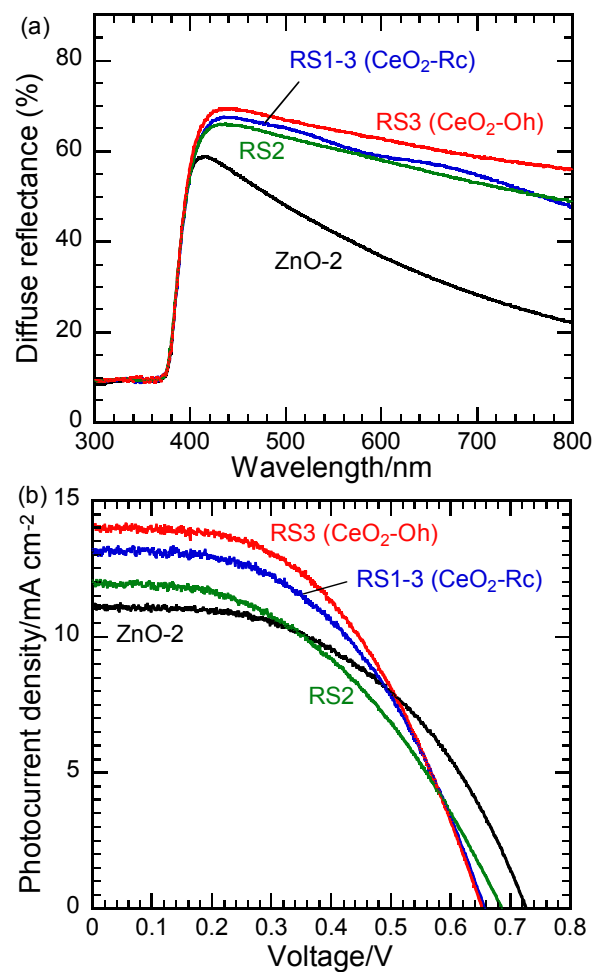

**Fig. S7** (a) Diffuse reflectance spectra, measured from the substrate side, of the ZnO-2 films without or with the CeO<sub>2</sub> layers using the RS1-3 (CeO<sub>2</sub>-Rc), RS2, or the RS3 (CeO<sub>2</sub>-Oh) particles, and (b)  $J$ - $V$  curves of the DSSCs using these films sensitized with N-719.

**Table S3** Characteristics of DSSCs using the N719-sensitized ZnO and CeO<sub>2</sub>/ZnO films.

| Film        | $J_{sc}/\text{mA cm}^{-2}$ | $V_{oc}/\text{V}$ | $ff(-)$ | $\eta$ (%) | Dye amount/ $10^{-8}$ mol cm <sup>-2</sup> |
|-------------|----------------------------|-------------------|---------|------------|--------------------------------------------|
| ZnO-2       | 11.30                      | 0.721             | 0.497   | 4.05       | 8.6                                        |
| RS1-3/ZnO-2 | 13.38                      | 0.662             | 0.493   | 4.35       | 10.5                                       |
| RS2/ZnO-2   | 11.83                      | 0.692             | 0.457   | 3.73       | 9.2                                        |
| RS3/ZnO-2   | 14.14                      | 0.651             | 0.471   | 4.34       | 11.0                                       |



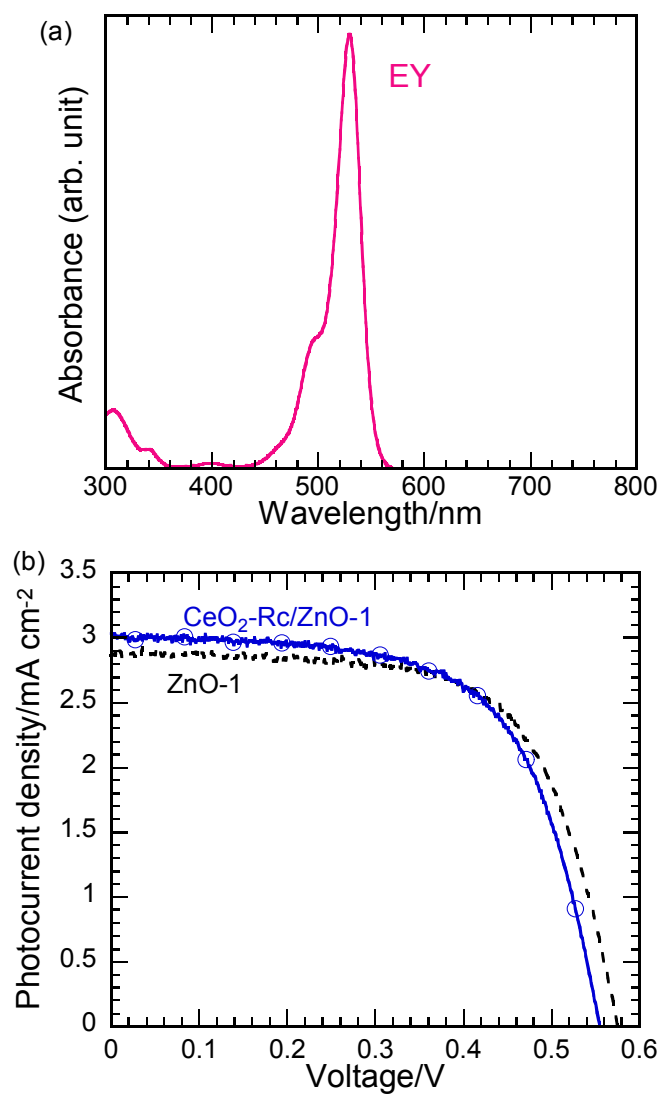

**Fig. S8** (a) An absorption spectrum of a  $3.0 \times 10^{-4} \text{ mol dm}^{-3}$  ethanol solution of eosin Y (EY), and (b)  $J$ - $V$  curves of the DSSCs using the ZnO-1 and the  $\text{CeO}_2\text{-Rc/ZnO-1}$  film sensitized with EY.

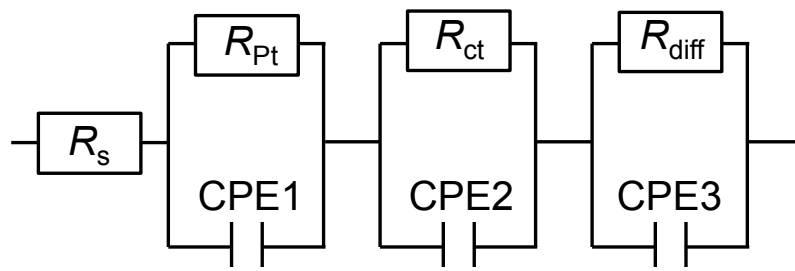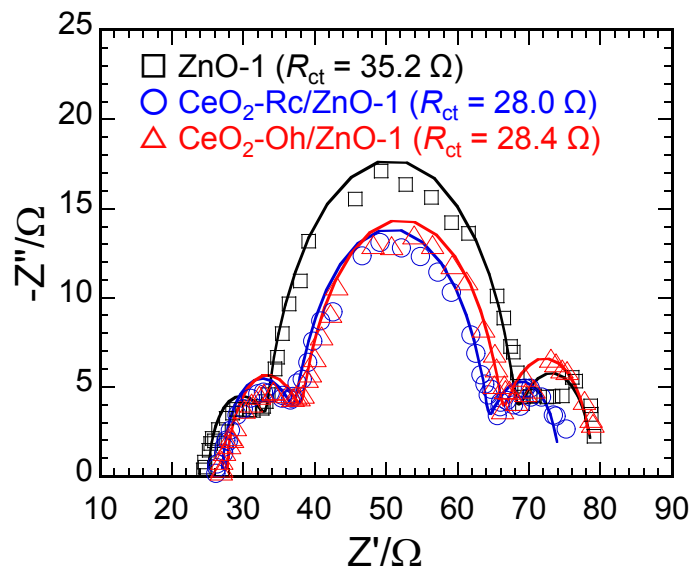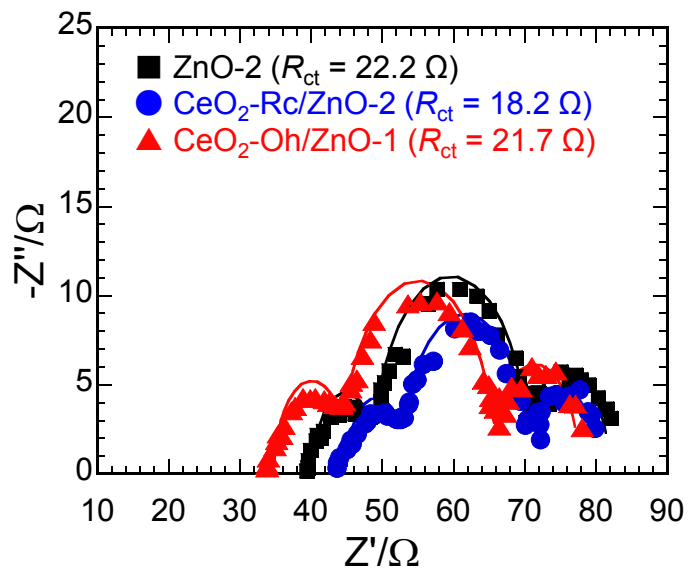

**Fig. S9** An equivalent circuit model and EIS Nyquist plots of the DSSCs using the ZnO and the CeO<sub>2</sub>/ZnO films sensitized with N-719. The EIS measurement was carried out using a frequency response analyzer (FRA, Solartron 1260A) under illumination with the AC amplitude of 10 mV and the frequency range from 10<sup>5</sup> to 10<sup>-2</sup> Hz. The EIS fitting was performed using ZSimp Win 3.2 (EChem Software).
